# Supplementary material for: Multiple fingerprints and quantitative analysis for comprehensive quality evaluation of Citri reticulatae pericarpium within different storage years
Source: Royal Society of Chemistry journal article supplement (doi:10.1039/d2nj02123d), 2022-01-01
Supplement: d2nj02123d1.pdf [file d2nj02123d1.pdf]

## Supplementary Information

### **Multiple fingerprints and quantitative analysis for comprehensive quality evaluation of *Citri Reticulata Pericarpium* within different storage years**

Miao Liu<sup>a</sup>, Xiang Li<sup>a</sup>, Tingting Dai<sup>a</sup>, Qian Li<sup>b</sup>, Yuqing Huang<sup>b</sup>, Ping Guo<sup>a,\*</sup>, Guoxiang Sun<sup>a,\*</sup>

<sup>a</sup>School of Pharmacy, Shenyang Pharmaceutical University, Shenyang, Liaoning 110016, China

<sup>b</sup>China Communication Technology (Jiang Men) Corporation, Guangdong, China

# Content

|                                                                                                                                                                                                                                                  |    |
|--------------------------------------------------------------------------------------------------------------------------------------------------------------------------------------------------------------------------------------------------|----|
| <b>Fig S1</b> Hierarchical clustering analysis (HCA) of CRP samples by using the common peak area of individual wavelength of HPLC. ....                                                                                                         | 3  |
| <b>Fig S2</b> The UV and DSC quantum spectra at different merging points, respectively ( <b>A</b> , <b>B</b> ), The $P_m$ values fluctuation of 30 samples of the quantum and original fingerprint at different merging points ( <b>C</b> )..... | 4  |
| <b>Table S1</b> Criteria of grade quality by QRFM.....                                                                                                                                                                                           | 5  |
| <b>Table S2</b> Calibration curves, linear ranges, LOD and LOQ of the three flavonoids. ...                                                                                                                                                      | 6  |
| <b>Table S3</b> Precision, repeatability, stability and recovery for quantitative analysis method.....                                                                                                                                           | 7  |
| <b>Table S4</b> Each parameter value of MAML. ....                                                                                                                                                                                               | 8  |
| <b>Table S5</b> Relative correction factors of nobiletin and tangeretin by QAMS. ....                                                                                                                                                            | 9  |
| <b>Table S6</b> The contents of the 3 markers by ESM and QAMS (mg/g).....                                                                                                                                                                        | 10 |

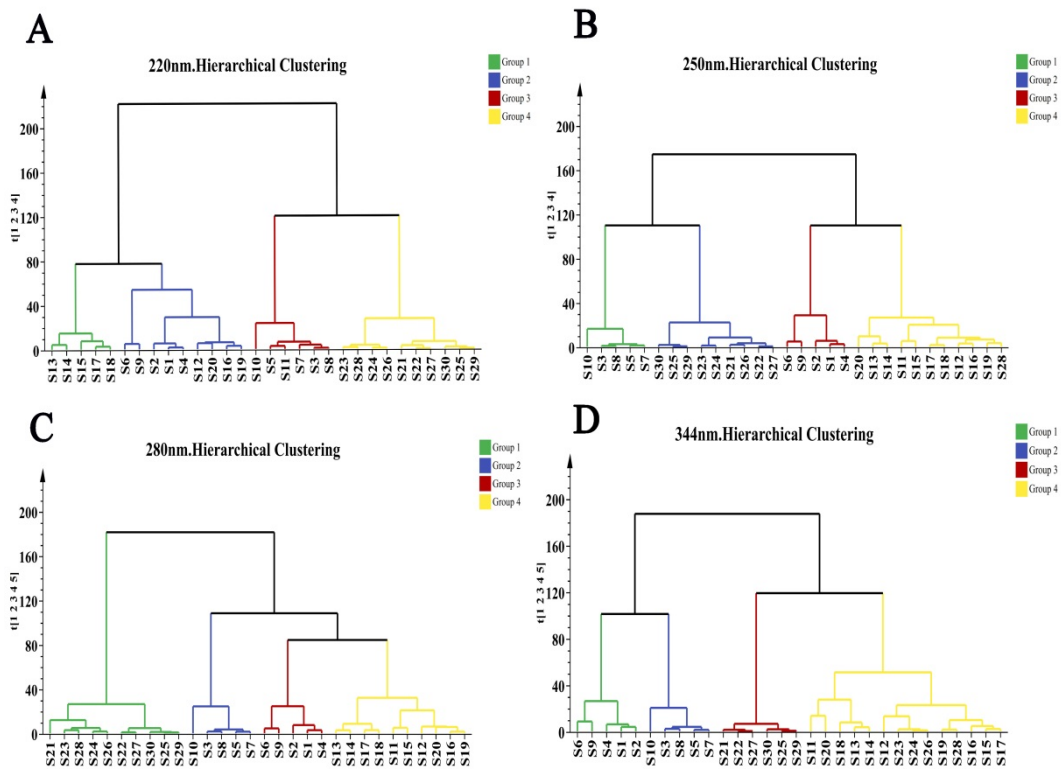

**Fig S1** Hierarchical clustering analysis (HCA) of CRP samples by using the common peak area of individual wavelength of HPLC.

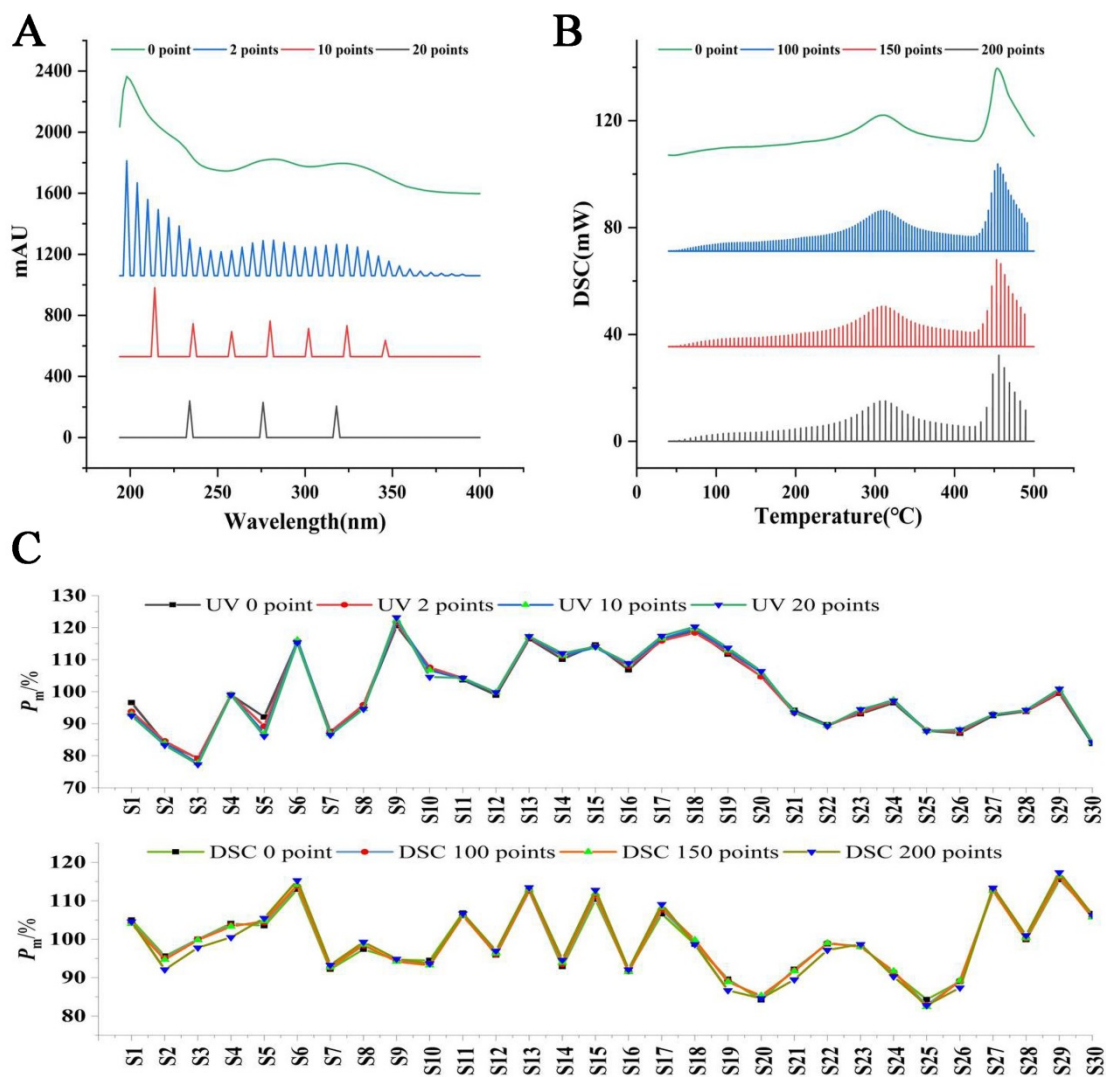

**Fig S2** The UV and DSC quantum spectra at different merging points, respectively (A, B), The  $P_m$  values fluctuation of 30 samples of the quantum and original fingerprint at different merging points (C).

**Table S1** Criteria of grade quality by QRFM

| Grade      | 1      | 2      | 3      | 4      | 5        | 6      | 7         | 8           |
|------------|--------|--------|--------|--------|----------|--------|-----------|-------------|
| $S_m \geq$ | 0.95   | 0.90   | 0.85   | 0.80   | 0.70     | 0.60   | 0.50      | $<0.5$      |
| $P_m/\%$   | 95-105 | 90-110 | 85-115 | 80-120 | 70-130   | 60-140 | 50-150    | 0- $\infty$ |
| Quality    | Best   | Better | Good   | Fine   | Moderate | Common | Defective | Inferior    |

**Table S2** Calibration curves, linear ranges, LOD and LOQ of the three flavonoids.

| Compounds  | Regression equation | r     | Linear range( $\mu\text{g/mL}$ ) | LOD( $\text{ng}$ ) | LOQ( $\text{ng/mL}$ ) |
|------------|---------------------|-------|----------------------------------|--------------------|-----------------------|
| Hesperidin | $y=8.6165x+15.068$  | 1.000 | 8.52-1278                        | 0.17               | 0.93                  |
| Nobiletin  | $y=11.305x+3.6818$  | 1.000 | 2.40-720                         | 0.48               | 1.44                  |
| Tangeretin | $y=15.174x+2.5898$  | 1.000 | 2.08-624                         | 0.42               | 1.68                  |

**Table S3** Precision, repeatability, stability and recovery for quantitative analysis method.

| Compounds  | Precision(n=6) | Repeatability (n = 6) | Stability (n = 7, 24 h) | Recovery (n = 6) |         |
|------------|----------------|-----------------------|-------------------------|------------------|---------|
|            | RSD (%)        | RSD (%)               | RSD (%)                 | Mean (%)         | RSD (%) |
| Hesperidin | 0.27           | 1.51                  | 0.50                    | 98.9             | 1.84    |
| Nobiletin  | 0.21           | 1.36                  | 0.40                    | 99.1             | 1.65    |
| Tangeretin | 0.21           | 1.37                  | 0.40                    | 97.8             | 0.98    |

**Table S4 Each parameter value of MAML.**

| Markers    | $C_0$  | $a$    | $b$    | $b_{ai}$ | $f_i$   | $f_{si}$ | $RE_{(b)}/\%$ |
|------------|--------|--------|--------|----------|---------|----------|---------------|
| Hesperidin | 643.26 | 15.068 | 8.6165 | 0.0234   | 8.6399  | 1.0000   | 0.27          |
| Nobiletin  | 361.2  | 3.6818 | 11.305 | 0.0102   | 11.3152 | 0.7636   | 0.09          |
| Tangeretin | 313.04 | 2.5898 | 15.174 | 0.0083   | 15.1823 | 0.5691   | 0.05          |



**Table S5** Relative correction factors of nobiletin and tangeretin by QAMS.

| No.   | Nobiletin | Tangeretin |
|-------|-----------|------------|
| 1     | 0.6668    | 0.5381     |
| 2     | 0.6820    | 0.5337     |
| 3     | 0.7886    | 0.5861     |
| 4     | 0.7738    | 0.5776     |
| 5     | 0.7702    | 0.5731     |
| 6     | 0.7632    | 0.5692     |
| 7     | 0.7610    | 0.5672     |
| Mean  | 0.7437    | 0.5636     |
| RSD/% | 6.50      | 3.53       |

**Table S6** The contents of the 3 markers by ESM and QAMS (mg/g).

| Sample | Hesperidin |        | Nobiletin |           | Tangeretin |      |           |
|--------|------------|--------|-----------|-----------|------------|------|-----------|
|        | ESM        | QAMS   | ESM       | $r_{E/Q}$ | QAMS       | ESM  | $r_{E/Q}$ |
| S1     | 5.85       | 3.29   | 3.39      | 0.9708    | 2.32       | 2.35 | 0.9869    |
| S2     | 5.13       | 2.88   | 2.97      | 0.9701    | 1.82       | 1.85 | 0.9864    |
| S3     | 6.33       | 2.45   | 2.52      | 0.9721    | 1.60       | 1.62 | 0.9882    |
| S4     | 6.50       | 3.43   | 3.53      | 0.9714    | 1.96       | 1.99 | 0.9879    |
| S5     | 7.30       | 2.41   | 2.48      | 0.9731    | 1.60       | 1.62 | 0.9891    |
| S6     | 8.87       | 3.46   | 3.56      | 0.9731    | 1.75       | 1.77 | 0.9900    |
| S7     | 7.48       | 2.50   | 2.57      | 0.9731    | 1.72       | 1.74 | 0.9891    |
| S8     | 7.57       | 2.12   | 2.18      | 0.9737    | 1.75       | 1.77 | 0.9891    |
| S9     | 9.93       | 3.38   | 3.47      | 0.9737    | 2.10       | 2.12 | 0.9901    |
| S10    | 6.67       | 2.13   | 2.19      | 0.9730    | 1.25       | 1.27 | 0.9893    |
| S11    | 6.71       | 2.69   | 2.77      | 0.9722    | 1.52       | 1.54 | 0.9888    |
| S12    | 6.62       | 3.47   | 3.57      | 0.9715    | 2.05       | 2.08 | 0.9880    |
| S13    | 11.88      | 3.29   | 3.38      | 0.9745    | 2.35       | 2.37 | 0.9906    |
| S14    | 12.07      | 2.97   | 3.05      | 0.9748    | 2.11       | 2.13 | 0.9909    |
| S15    | 9.71       | 2.78   | 2.86      | 0.9741    | 1.76       | 1.78 | 0.9904    |
| S16    | 5.64       | 3.20   | 3.30      | 0.9706    | 1.96       | 1.98 | 0.9870    |
| S17    | 9.90       | 3.18   | 3.26      | 0.9738    | 2.11       | 2.13 | 0.9901    |
| S18    | 10.32      | 3.43   | 3.52      | 0.9738    | 2.63       | 2.66 | 0.9899    |
| S19    | 5.07       | 3.03   | 3.12      | 0.9699    | 2.24       | 2.27 | 0.9858    |
| S20    | 8.72       | 3.48   | 3.57      | 0.9731    | 2.09       | 2.11 | 0.9895    |
| S21    | 4.30       | 2.49   | 2.57      | 0.9690    | 1.48       | 1.50 | 0.9853    |
| S22    | 3.76       | 2.72   | 2.81      | 0.9673    | 1.57       | 1.60 | 0.9837    |
| S23    | 4.68       | 3.28   | 3.39      | 0.9690    | 2.02       | 2.05 | 0.9853    |
| S24    | 4.45       | 2.98   | 3.08      | 0.9688    | 1.84       | 1.87 | 0.9851    |
| S25    | 4.47       | 2.61   | 2.69      | 0.9692    | 1.61       | 1.63 | 0.9854    |
| S26    | 5.56       | 2.89   | 2.98      | 0.9707    | 1.87       | 1.89 | 0.9869    |
| S27    | 4.89       | 2.75   | 2.83      | 0.9698    | 1.68       | 1.70 | 0.9861    |
| S28    | 5.16       | 3.13   | 3.23      | 0.9700    | 2.10       | 2.13 | 0.9861    |
| S29    | 4.28       | 2.44   | 2.52      | 0.9690    | 1.47       | 1.50 | 0.9852    |
| S30    | 3.54       | 2.31   | 2.39      | 0.9671    | 1.46       | 1.49 | 0.9832    |
| P      |            | 0.4447 |           |           | 0.7786     |      |           |
